# Supplementary material for: Controllable manipulation of bubbles in water by using underwater superaerophobic graphene-oxide/gold-nanoparticle composite surfaces
Source: Royal Society of Chemistry journal article supplement (doi:10.1039/c7nr07349f), 2017-11-21
Supplement: c7nr07349f1.pdf [file c7nr07349f1.pdf]

## **Controllable manipulation of bubbles in water by using underwater superaerophobic graphene-oxide/gold-nanoparticle composite surfaces**

Ruixin Xu,<sup>a</sup> Xiangyang Xu,<sup>a</sup> Minghui He,<sup>\*b</sup> Bin Su<sup>\*c</sup>

<sup>a</sup>School of Media and Communication, Shenzhen Polytechnic, Shenzhen, 518055, China

<sup>b</sup>State Key Laboratory of Pulp & Paper Engineering, South China University of Technology, Guangzhou 510640, China. E-mail: heminghui\_2008@163.com

<sup>c</sup>Department of Chemical Engineering, Clayton, Vic 3800, Australia. E-mail: subin0000@iccas.ac.cn

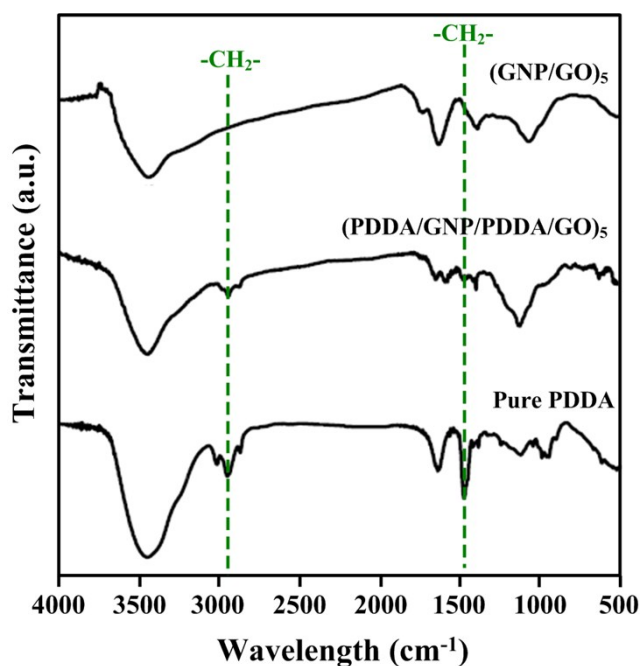

**Fig. S1** Fourier transform infrared spectroscopy (FTIR) spectrum of (GNP/GO)<sub>5</sub>, (PDDA/GNP/PDDA/GO)<sub>5</sub> hybrid films and pure polydiallyldimethylammonium chloride (PDDA). In the case of the (PDDA/GNP/PDDA/GO)<sub>5</sub> hybrid film (before the heating treatment) or pure PDDA, both spectra showed the characteristic absorption bands in 2929 cm<sup>-1</sup> (-CH<sub>2</sub>- symmetrical stretching frequency) and 1469 cm<sup>-1</sup> (-CH<sub>2</sub>- stretching vibration). However, these two peaks disappeared in the (GNP/GO)<sub>5</sub> curve (after the heating treatment), indicating the removing of organic PDDA from the hybrid film.

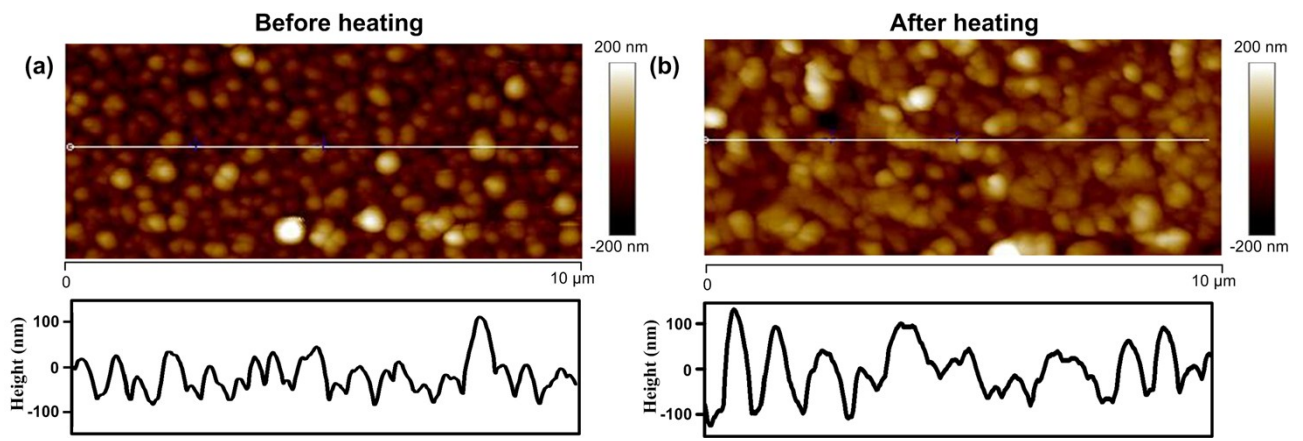

**Fig. S2** The heating treatment facilitated the construction of considerable surface roughness through partly aggregation/ merging of GNPs. Atom force microscope (AFM) investigation of the (GNP/GO)<sub>5</sub> hybrid film (a) before and (b) after the heating treatment.

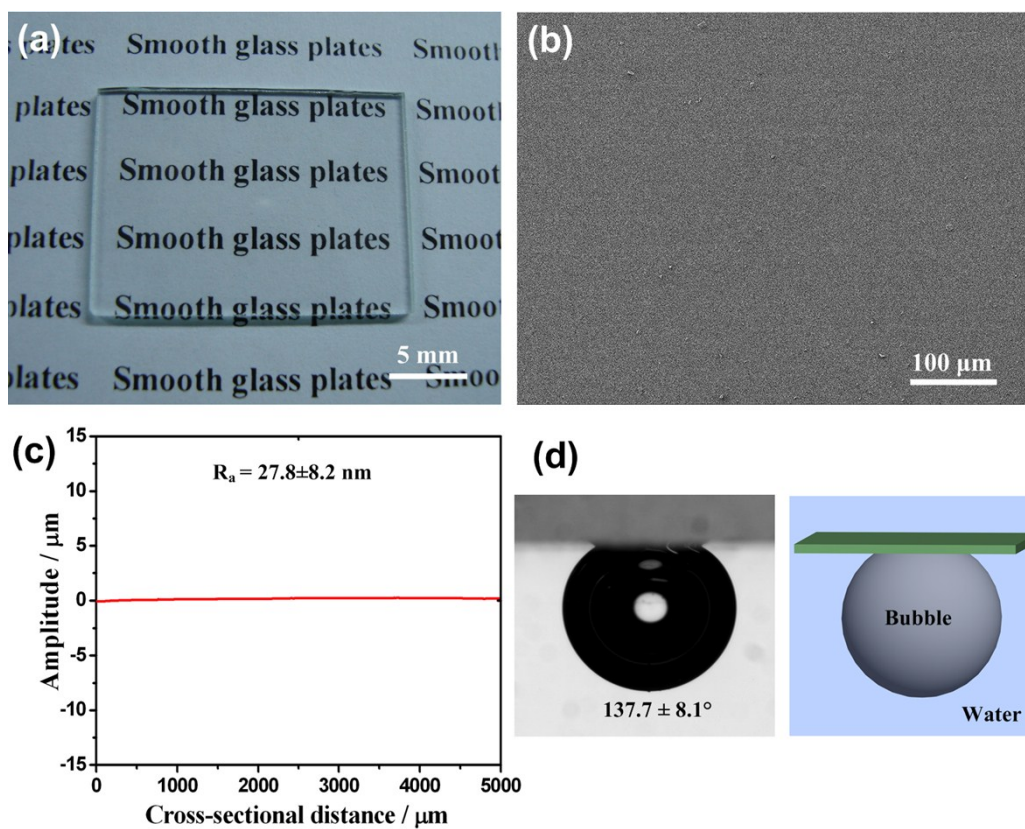

**Fig. S3** Underwater aerophobicity of a bare glass plate. (a) Photograph and (b) top-view scanning electron microscope (SEM) image of a bare glass plate. (c) Cross-sectional profile of the glass plate. (d) Photograph of a bubble placed below the downward glass plate under the water surface. Right is the schematic illustration.

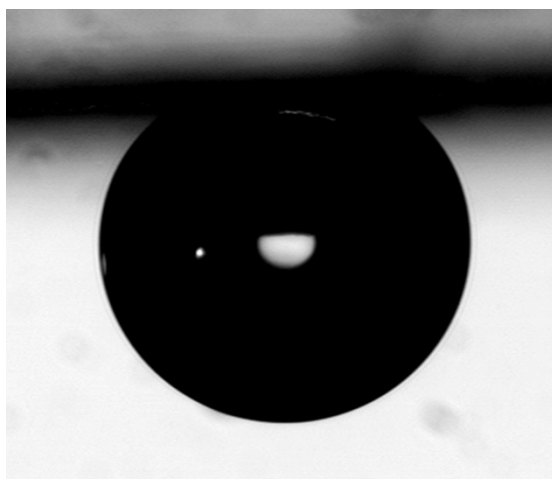

**Fig. S4** Photograph of a bubble placed below the downward (PDDA/GO)<sub>5</sub> hybrid films under the water surface.

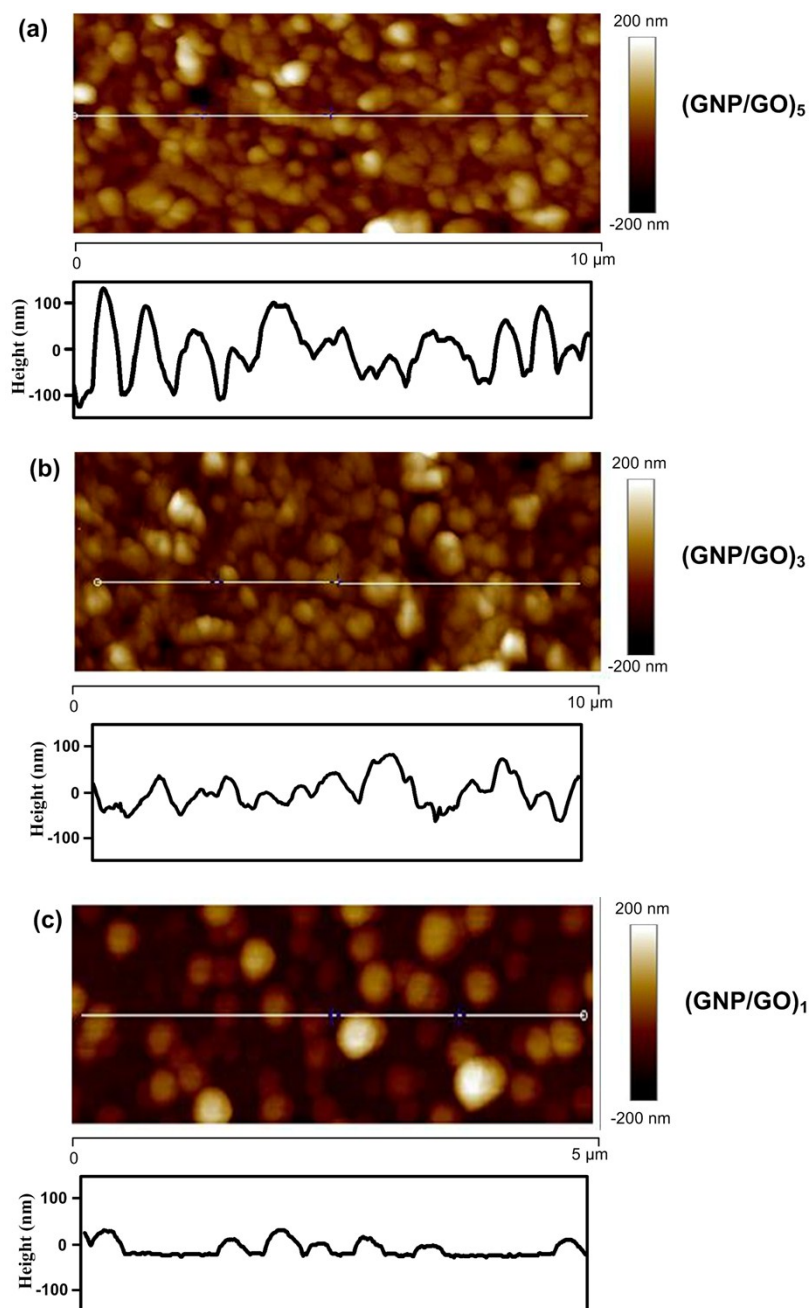

**Fig. S5** AFM investigation of (a)  $(\text{GNP}/\text{GO})_5$ , (b)  $(\text{GNP}/\text{GO})_3$ , (c)  $(\text{GNP}/\text{GO})_1$  hybrid films. The bottom parts are the cross-sectional profile of the rough surfaces.
